# Supplementary material
Source: Springer Nature journal article supplement (https://www.springermedizin.de/resource/supplementary/12985_2011_1544_MOESM12_ESM.pdf/9610044)
Supplement: MOESM12 [file 9610044]

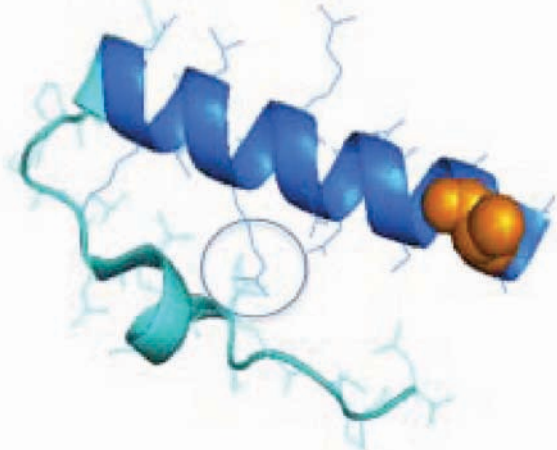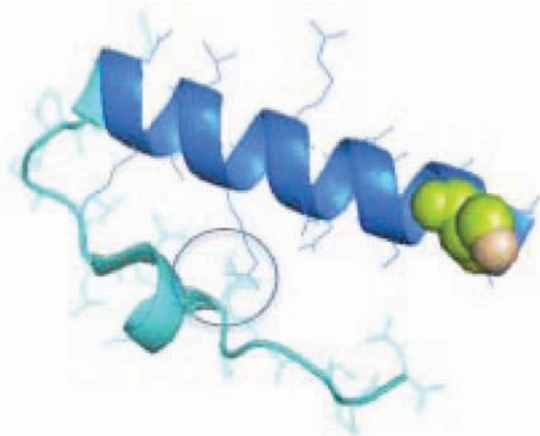

Left: ZANK with B-958 residue alanine 205 (orange) indicated

Right: ZANK with Akata residue serine 205 (serine green with pink hydroxyl).

Position of contact between ZANK stem and loop residues indicated (circle)
